# Supplementary material for: YOLOv8-FCS: A more focused YOLOv8 model for defect detection in images of steel surface
Source: Research Square preprint supplement (doi:10.21203/rs.3.rs-4368440/v1), 2024-05-13
Supplement: Supplementary file 1 [file eccfbd1548eeaa20993eeaf2.docx]

# Highlights

**YOLOv8-FCS: A more focused YOLOv8 model for defect detection in images of steel surface**

1. Propose a one-stage detection network, YOLOv8-FCS, for steel surface defect detection.
2. Introduce an image preprocessing method called AIS that can fully utilize the prior features of grayscale images.
3. Apply a hybrid attention module to the model.
4. Validate the effectiveness and feasibility of the model on three open-source detection datasets.
